# Supplementary material for: Coupling nonstoichiometric Cu2−xSe with stable Cu2Se berzelianite for efficient synergistic electrocatalytic hydrazine-assisted water splitting
Source: Royal Society of Chemistry journal article supplement (doi:10.1039/d2qi01699k), 2022-01-01
Supplement: d2qi01699k1.pdf [file d2qi01699k1.pdf]

## Supporting Information

### **Coupling of nonstoichiometric $\text{Cu}_{2-x}\text{Se}$ with stable $\text{Cu}_2\text{Se}$ berzelianite for efficient synergistic electrocatalytic hydrazine-assisted water splitting**

Xian-Wei Lv<sup>a</sup>, Qing-Hui Kong<sup>a</sup>, Xin-Lian Song<sup>a</sup>, Yuping Liu<sup>b</sup>, Zhong-Yong Yuan<sup>a,b,\*</sup>

<sup>a</sup> National Institute for Advanced Materials, School of Materials Science and Engineering, Nankai University, Tianjin 300350, China

<sup>b</sup> Key Laboratory of Advanced Energy Materials Chemistry (Ministry of Education), College of Chemistry, Nankai University, Tianjin 300071, China

\* Corresponding author. *E-mail*: [zyyuan@nankai.edu.cn](mailto:zyyuan@nankai.edu.cn)

## Supplementary figures

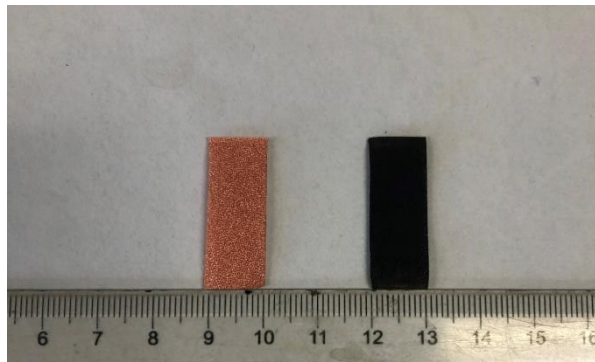

**Figure S1.** Digital photographs of pristine Cu foam and Cu<sub>x</sub>Se/CF samples.

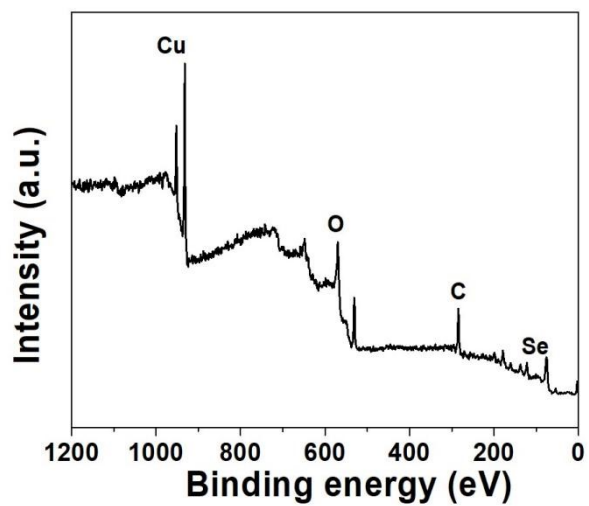

**Figure S2.** XPS survey spectra of Cu<sub>x</sub>Se/CF.

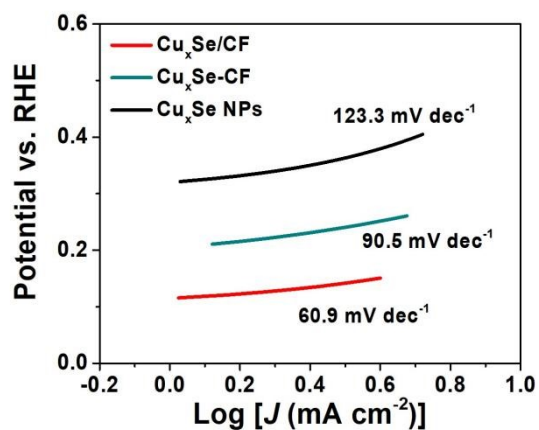

**Figure S3.** The Tafel slopes of  $\text{Cu}_x\text{Se}/\text{CF}$ ,  $\text{Cu}_x\text{Se-CF}$ , and  $\text{Cu}_x\text{Se NPs}$  toward the HzOR.

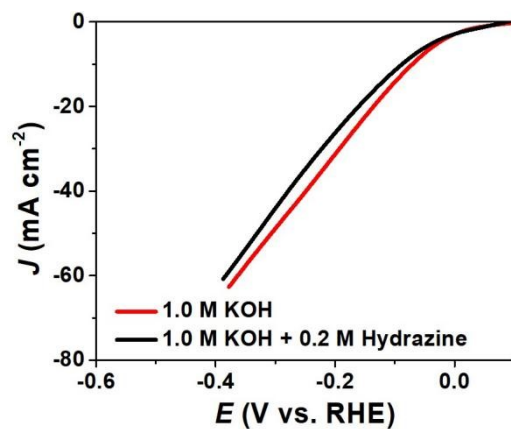

**Figure S4.** LSV curve of  $\text{Cu}_x\text{Se}/\text{CF}$  towards HER at a scan rate of  $10 \text{ mV s}^{-1}$  in  $1.0 \text{ M KOH}$  electrolyte with and without  $0.2 \text{ M}$  hydrazine.

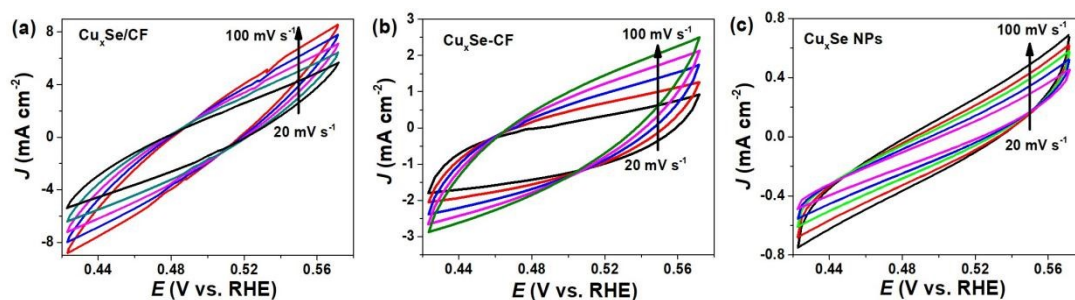

**Figure S5.** Cyclic voltammograms of (a)  $\text{Cu}_x\text{Se}/\text{CF}$ , (b)  $\text{Cu}_x\text{Se-CF}$ , and (c)  $\text{Cu}_x\text{Se NPs}$  measured at different scan rates from  $20$  to  $100 \text{ mV s}^{-1}$ .

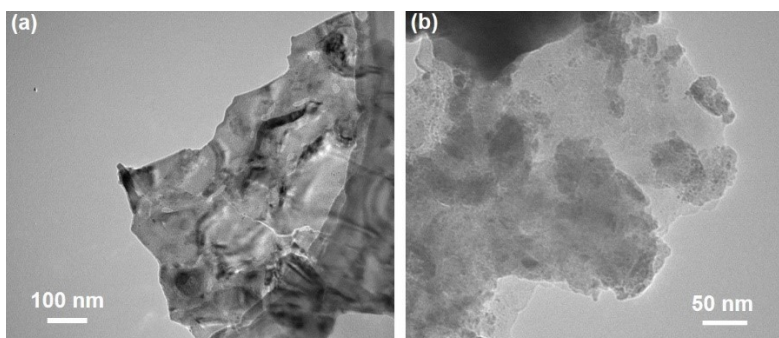

**Figure S6.** TEM images of Cu<sub>2</sub>Se/CF control samples.

### Supplementary videos

**Video S1.** Video of displaying the generation of hydrogen bubbles during hydrazine-assisted water splitting.

## Supplementary tables

**Table S1.** Comparison of HER performance of some recently reported Cu-based catalysts.

| Catalyst              | Electrolyte                          | $E_{j=10}$ (mV)<br>vs. RHE | Tafel slop (mV·dec <sup>-1</sup> ) | Reference |
|-----------------------|--------------------------------------|----------------------------|------------------------------------|-----------|
| Cu <sub>x</sub> Se/CF | 1.0 M KOH                            | 79                         | 106                                | This work |
| Cu-Ni nanocages       | 1.0 M KOH                            | 140                        | 79                                 | 1         |
| Cu-Co-P20 foam        | 1.0 M KOH                            | 138                        | 48                                 | 2         |
| Ni/Cu/CF              | 1.0 M KOH                            | 38                         | 42.7                               | 3         |
| GDY/CuS               | 1.0 M KOH                            | 106                        | 63.8                               | 4         |
| Cu@WC                 | 1.0 M KOH                            | 119                        | 88.7                               | 5         |
| Ni-Se-Cu              | 1.0 M KOH                            | 136                        | 117.5                              | 6         |
| Ni-Cu B               | 1.0 M KOH                            | 202                        | 82                                 | 7         |
| CuNPs/CNFs            | 0.5 M H <sub>2</sub> SO <sub>4</sub> | 200                        | 152                                | 8         |
| CuS@C                 | 0.5 M H <sub>2</sub> SO <sub>4</sub> | 128                        | 44                                 | 9         |
| 3% CoS2-7% CuS        | 0.5 M H <sub>2</sub> SO <sub>4</sub> | 62                         | 46                                 | 10        |

**Table S2.** Comparison of electrocatalytic performance of some recently reported HzOR catalysts in alkaline electrolyte solution.

| Catalyst                              | Electrolyte                              | $E_{j=20}$ (V) vs. SCE       | Tafel slop<br>( $\text{mV}\cdot\text{dec}^{-1}$ ) | Reference |
|---------------------------------------|------------------------------------------|------------------------------|---------------------------------------------------|-----------|
| $\text{Cu}_x\text{Se}/\text{CF}$      | 1.0 M KOH, 0.2 M $\text{N}_2\text{H}_4$  | 0.53                         | 60.9                                              | This work |
| $\text{Ni}_{0.43}\text{Cu}_{0.57}$    | 3.0 M NaOH, 0.1 M $\text{N}_2\text{H}_4$ | -0.6 ( $E_{j=300}$ )         | N.A.                                              | 11        |
| Cu-SA/PCN                             | 1.0 M KOH, 0.1 M $\text{N}_2\text{H}_4$  | 0.336 ( $E_{j=100}$ )        | 142                                               | 12        |
| SeNCM-1000                            | 1.0 M KOH, 0.1 M $\text{N}_2\text{H}_4$  | 0.34 (onset potential)       | N.A.                                              | 13        |
| MnO/N-C                               | 0.1 M KOH, 0.1 M $\text{N}_2\text{H}_4$  | -0.43                        | N.A.                                              | 14        |
| $\text{Fe}_2\text{O}_3/\text{ECP-15}$ | 1.0 M KOH, 0.1 M $\text{N}_2\text{H}_4$  | 0.664 vs. RHE ( $E_{j=10}$ ) | 179.2                                             | 15        |
| Ni(Cu) CNPs                           | 1.0 M KOH, 0.5 M $\text{N}_2\text{H}_4$  | 0.233 ( $E_{j=300}$ )        | 50.2                                              | 16        |

**Table S3.** Comparison of some recently reported bifunctional Cu-based catalysts for hydrazine-assisted water splitting in 1.0 M KOH.

| Catalyst                         | Substrates | $E_{j=25}$ (V) vs. RHE | Reference |
|----------------------------------|------------|------------------------|-----------|
| $\text{Cu}_x\text{Se}/\text{CF}$ | Cu foam    | 0.49                   | This work |
| Ni(Cu) CNPs                      | Ni foam    | 1.0 ( $E_{j=504}$ )    | 16        |
| Ni(Cu)/NF                        | Ni foam    | 0.41 ( $E_{j=100}$ )   | 17        |
| Ni(Cu)@NiFeP/NM                  | Ni foam    | 0.491 ( $E_{j=100}$ )  | 18        |
| $\text{Cu}_3\text{P}/\text{CF}$  | Ni foam    | 0.72 ( $E_{j=100}$ )   | 19        |
| Ni-Cu-P@ Ni-Cu                   | Ni foam    | 125 mV ( $E_{j=10}$ )  | 20        |

## References

- [1] Z. Li, C. Yu, Y. Wen, Y. Gao, X. Xing, Z. Wei, H. Sun, Y.-W. Zhang, W. Song, Mesoporous hollow Cu–Ni alloy nanocage from core–shell Cu@ Ni nanocube for efficient hydrogen evolution reaction, *ACS Catal.*, 9 (2019) 5084-5095.
- [2] Y.S. Park, W.-S. Choi, M.J. Jang, J.H. Lee, S. Park, H. Jin, M.H. Seo, K.-H. Lee, Y. Yin, Y. Kim, Three-dimensional dendritic Cu–Co–P electrode by one-step electrodeposition on a hydrogen bubble template for hydrogen evolution reaction, *ACS Sustain. Chem. Eng.*, 7 (2019) 10734-10741.
- [3] S. Li, M. Li, Y. Ni, Grass-like Ni/Cu nanosheet arrays grown on copper foam as efficient and non-precious catalyst for hydrogen evolution reaction, *Appl. Catal. B: Environ.*, 268 (2020) 118392.
- [4] G. Shi, Z. Fan, L. Du, X. Fu, C. Dong, W. Xie, D. Zhao, M. Wang, M. Yuan, In situ construction of graphdiyne/CuS heterostructures for efficient hydrogen evolution reaction, *Mater. Chem. Front.*, 3 (2019) 821-828.
- [5] M. Yao, B. Wang, B. Sun, L. Luo, Y. Chen, J. Wang, N. Wang, S. Komarneni, X. Niu, W. Hu, Rational design of self-supported Cu@ WC core-shell mesoporous nanowires for pH-universal hydrogen evolution reaction, *Appl. Catal. B: Environ.*, 280 (2021) 119451.
- [6] Y. Gao, Y. Wu, H. He, W. Tan, Potentiostatic electrodeposition of Ni–Se–Cu on nickel foam as an electrocatalyst for hydrogen evolution reaction, *J. Colloid Interf. Sci.*, 578 (2020) 555-564.
- [7] N. Lotfi, T. Shahrabi, Y. Yaghoubinezhad, G.B. Darband, Surface modification of Ni foam by the dendrite Ni-Cu electrode for hydrogen evolution reaction in an alkaline solution, *J. Electroanal. Chem.*, 848 (2019) 113350.
- [8] J. Wang, H. Zhu, J. Chen, B. Zhang, M. Zhang, L. Wang, M. Du, Small and well-dispersed Cu nanoparticles on carbon nanofibers: self-supported electrode materials for efficient hydrogen evolution reaction, *Int. J. Hydrogen Energ.*, 41 (2016) 18044-18049.

- [9] J. Rong, J. Xu, F. Qiu, Y. Fang, T. Zhang, Y. Zhu, 2D metal-organic frameworks-derived preparation of layered CuS@C as an efficient and stable electrocatalyst for hydrogen evolution reaction, *Electrochim. Acta*, 323 (2019) 134856.
- [10] M. Li, Y. Qian, J. Du, H. Wu, L. Zhang, G. Li, K. Li, W. Wang, D.J. Kang, CuS nanosheets decorated with CoS<sub>2</sub> nanoparticles as an efficient electrocatalyst for enhanced hydrogen evolution at all pH values, *ACS Sustain. Chem. Eng.*, 7 (2019) 14016-14022.
- [11] M. Sun, Z. Lu, L. Luo, Z. Chang, X. Sun, A 3D porous Ni-Cu alloy film for high-performance hydrazine electrooxidation, *Nanoscale*, 8 (2016) 1479-1484.
- [12] C. Zhang, W. Yuan, Q. Wang, X. Peng, X. Liu, J. Luo, Single Cu Atoms as Catalysts for Efficient Hydrazine Oxidation Reaction, *ChemNanoMat*, 6 (2020) 1474-1478.
- [13] T. Wang, Q. Wang, Y. Wang, Y. Da, W. Zhou, Y. Shao, D. Li, S. Zhan, J. Yuan, H. Wang, Atomically dispersed semimetallic selenium on porous carbon membrane as an electrode for hydrazine fuel cells, *Angew. Chem. Int. Ed.*, 131 (2019) 13600-13605.
- [14] J. Ding, P. Kannan, P. Wang, S. Ji, H. Wang, Q. Liu, H. Gai, F. Liu, R. Wang, Synthesis of nitrogen-doped MnO/carbon network as an advanced catalyst for direct hydrazine fuel cells, *J. Power Sources*, 413 (2019) 209-215.
- [15] Y. Wang, Z. Chen, H. Wu, F. Xiao, E. Cao, S. Du, Y. Wu, Z. Ren, Self-assembly-induced mosslike Fe<sub>2</sub>O<sub>3</sub> and FeP on electro-oxidized carbon paper for low-voltage-driven hydrogen production plus hydrazine degradation, *ACS Sustain. Chem. Eng.*, 6 (2018) 15727-15736.
- [16] Q. Sun, Y. Li, J. Wang, B. Cao, Y. Yu, C. Zhou, G. Zhang, Z. Wang, C. Zhao, Pulsed electrodeposition of well-ordered nanoporous Cu-doped Ni arrays promotes high-efficiency overall hydrazine splitting, *J. Mater. Chem. A*, 8 (2020) 21084-21093.
- [17] Q. Sun, L. Wang, Y. Shen, M. Zhou, Y. Ma, Z. Wang, C. Zhao, Bifunctional copper-doped nickel catalysts enable energy-efficient hydrogen production via hydrazine oxidation and hydrogen evolution reduction, *ACS Sustain. Chem. Eng.*, 6 (2018) 12746-12754.
- [18] Q. Sun, M. Zhou, Y. Shen, L. Wang, Y. Ma, Y. Li, X. Bo, Z. Wang, C. Zhao, Hierarchical nanoporous Ni(Cu) alloy anchored on amorphous NiFeP as efficient bifunctional electrocatalysts for hydrogen evolution and hydrazine oxidation, *J. Catal.*, 373 (2019) 180-189.
- [19] M. Liu, R. Zhang, L. Zhang, D. Liu, S. Hao, G. Du, A.M. Asiri, R. Kong, X. Sun, Energy-efficient electrolytic hydrogen generation using a Cu<sub>3</sub>P nanoarray as a bifunctional catalyst for hydrazine oxidation and water reduction, *Inorgan. Chem. Front.*, 4 (2017) 420-423.
- [20] G.B. Darband, N. Lotfi, A. Aliabadi, S. Hyun, S. Shanmugam, Hydrazine-assisted electrochemical hydrogen production by efficient and self-supported electrodeposited Ni-Cu-P@Ni-Cu nano-micro dendrite catalyst, *Electrochim. Acta*, 382 (2021) 138335.
